# Supplementary material
Source: ML conference proceedings conference paper supplement (https://proceedings.neurips.cc/paper_files/paper/2012/hash/4e732ced3463d06de0ca9a15b6153677-Abstract.html)
Supplement: Supplementary file [file 4e732ced3463d06de0ca9a15b6153677-Supplemental.zip]

## Supplementary Material

### A Complete convergence analysis in the regularized case

**Basic setup:** We are minimizing a function  $f$  of the form  $F + R$  where  $F$  is a convex differentiable function  $F : \mathbb{R}^p \rightarrow \mathbb{R}$  that satisfies a second order upper bound

$$F(w + \Delta) \leq F(w) + \nabla F(w)^T w + \frac{\beta}{2} \Delta^T A^T A \Delta$$

and  $R : \mathbb{R}^p \rightarrow \mathbb{R}$  is convex (and possibly non-differentiable) and separable across coordinates:

$$R(w) = \sum_{j=1}^p r(w_j)$$

In our case  $\mathbf{X}$  is the  $n \times p$  design matrix. If columns of  $\mathbf{X}$  are zero mean and unit variance normalized then entries in  $\mathbf{X}^T \mathbf{X}$  measure the correlation between features. Also,  $r(x) = \lambda|x|$ .

Divide the  $p$  features into  $B$  blocks of  $p/B$  features each. The algorithm we analyze is block-greedy, a direct generalization of Shotgun ( $B = p$  in the Shotgun case). In the regularized case, the block-greedy algorithm is

**For**  $P$  randomly chosen blocks in parallel **do**

- Within a block  $b$ , find  $j = j_b \in b$  such that  $|\eta_j|$  is maximum and update

$$w'_j \leftarrow w_j - \eta_j$$

**Endfor**

Here  $|\eta_j|$  serves to quantify the guaranteed descent (based on second order upper bound) if feature  $j$  is updated and solves the one-dimensional problem

$$\eta_j = \operatorname{argmin}_{\eta} \nabla_j F(w) \eta + \frac{\beta}{2} \eta^2 + r(w_j + \eta) - r(w_j) .$$

Note that if there is no regularization, then  $\eta_j = -\nabla_j F(w)/\beta = g_j/\beta$  and this is the case we analyzed in the main body of the paper. In the general case, by first order optimality conditions for the above one-dimensional convex optimization problem, we have

$$g_j + \beta \eta_j + \nu_j = 0$$

where  $\nu_j$  is a subgradient of  $r$  at  $w_j + \eta_j$ . That is,  $\nu_j \in \partial r(w_j + \eta_j)$ . This implies that

$$r(w_j + \eta_j) - r(w') \leq \nu_j(w_j + \eta_j - w')$$

for any  $w'$ .

We first calculate the expected change in objective function following the Shotgun analysis. We will use  $w_b$  to denote  $w_{j_b}$  (similarly for  $\nu_b, g_b$ )

$$\begin{aligned} \mathbb{E}[f(\mathbf{w}') - f(\mathbf{w})] &= P \mathbb{E}_b \left[ \eta_b g_b + \frac{\beta}{2} (\eta_b)^2 + r(w_b + \eta_b) - r(w_b) \right] \\ &\quad + \frac{\beta}{2} P(P-1) \mathbb{E}_{b \neq b'} [\eta_b \cdot \eta_{b'} \cdot A_{j_b}^T A_{j_{b'}}] \end{aligned}$$

Define the  $B \times B$  matrix  $M$  (depends on the current iteration) with entries  $M_{b,b'} = A_{j_b}^T A_{j_{b'}}$ . Then, using  $r(w_b + \eta_b) - r(w_b) \leq \nu_b \eta_b$ , we continue

$$\begin{aligned} &\leq \frac{P}{B} \left[ \eta^T g + \frac{\beta}{2} \eta^T \eta + \nu^T \eta \right] \\ &\quad + \frac{\beta P(P-1)}{2B(B-1)} [\eta^\top M \eta - \eta^T \eta] \end{aligned}$$

Above (with some abuse of notation),  $\eta$ ,  $\nu$  and  $g$  are  $B$  length vectors with components  $\eta_b$ ,  $\nu_b$  and  $g_b$  respectively.

Our generalization of Shotgun's  $\rho_{\text{block}}$  parameter is

$$\rho_{\text{block}} = \max_{M \in \mathcal{M}} \rho(M)$$

where  $\mathcal{M}$  is the set of all  $B \times B$  submatrices obtainable from  $\mathbf{X}^T \mathbf{X}$  by selecting exactly one index from each of the  $B$  blocks.

So, we continue

$$\begin{aligned} &\leq \frac{P}{B} \left[ \eta^T g + \frac{\beta}{2} \eta^T \eta - g^T \eta - \beta \eta^T \eta \right] \\ &\quad + \frac{\beta P(P-1)}{2B(B-1)} (\rho_{\text{block}} - 1) \eta^T \eta \end{aligned}$$

where we used  $\nu = -g - \beta \eta$ .

Simplifying we get

$$\mathbb{E} [f(\mathbf{w}') - f(\mathbf{w})] \leq \frac{P\beta}{2B} [-1 + \epsilon] \|\eta\|_2^2$$

where

$$\epsilon = \frac{(P-1)(\rho_{\text{block}} - 1)}{(B-1)}$$

should be less than 1.

Now note that

$$\|\eta\|_2^2 = \sum_b |\eta_{jb}|^2 = \|\eta\|_{\infty,2}^2.$$

where the “infinity-2” norm  $\|\cdot\|_{\infty,2}$  of a  $p$ -vector is, by definition, as follows: take the  $\ell_\infty$  norm within a block and take the  $\ell_2$  of the resulting values. Note that in the second step above, we moved from a  $B$ -length  $\eta$  to a  $p$  length  $\eta$ .

This gives us

$$\mathbb{E} [f(\mathbf{w}') - f(\mathbf{w})] \leq -\frac{(1-\epsilon)P\beta}{2B} \|\eta\|_{\infty,2}^2. \quad (2)$$

From the results in Dhillon et al. [2011] we know that  $f(\mathbf{w}) - f(\mathbf{w}^*) \leq C\|\eta\|_\infty$  where the constant  $C$  depends on the function  $F$  (e.g. its smoothness and Lipschitz constants) and the maximum value  $\|\mathbf{w} - \mathbf{w}^*\|_1$  can take over the course of the algorithm. Because  $\|\eta\|_\infty \leq \|\eta\|_{\infty,2}$ , plugging this into (2), we get

$$\mathbb{E} [f(\mathbf{w}') - f(\mathbf{w})] \leq -\frac{(1-\epsilon)P\beta}{2BC} (f(\mathbf{w}) - f(\mathbf{w}^*))^2.$$

Defining the accuracy  $\alpha_k = F(w_k) - F(w^*)$ , we translate the above into the recurrence

$$\mathbb{E} [\alpha_{k+1} - \alpha_k] \leq -\frac{(1-\epsilon)P\beta}{2BC} \mathbb{E} [\alpha_k^2]$$

and by Jensen's we have  $(\mathbb{E} [\alpha_k])^2 \leq \mathbb{E} [\alpha_k^2]$  and therefore

$$\mathbb{E} [\alpha_{k+1}] - \mathbb{E} [\alpha_k] \leq -\frac{(1-\epsilon)P\beta}{2BC} (\mathbb{E} [\alpha_k])^2$$

which solves to (upto a universal constant factor)

$$\mathbb{E} [\alpha_k] \leq \frac{2BC}{(1-\epsilon)P\beta} \cdot \frac{1}{k}.$$
